# Supplementary material for: Methylation of a HTR3A promoter variant alters the binding of transcription factor CTCF
Source: Royal Society of Chemistry journal article supplement (doi:10.1039/c5ra04455c), 2015-01-01
Supplement: c5ra04455c1.pdf [file c5ra04455c1.pdf]

### Supplementary figure legends

**Figure S1:** Secondary structure of CTCF (PDB:2CT1) DNA binding domain.

**Figure S2:** Lowest energy structures of the docked C-allele:CTCF complex.

**Figure S3:** Lowest energy structures of the docked T-allele:CTCF complex.

**Figure S4:** Lowest energy structures of the docked me-C-allele:CTCF complex.

**Figure S5:** Conformational changes of DNA:Protein complexes over simulation time of 50 ns. Time 0 ns represent the start of reaction and 50 ns represent end of reaction. (A) C-allele:CTCF complex, (B) T-allele:CTCF complex, (C) me-C-allele:CTCF complex.

**Figure S6:** 2D graph showing the residue contacts of the docked complexes. (A) C-allele:CTCF complex, (B) T-allele:CTCF complex, (C) me-C-allele:CTCF complex.

### Movie

**Supplementary Video 1:** Simulation movie of C-allele:CTCF complex.

**Supplementary Video 2:** Simulation movie of T-allele:CTCF complex.

**Supplementary Video 3:** Simulation movie of me-C-allele:CTCF complex.

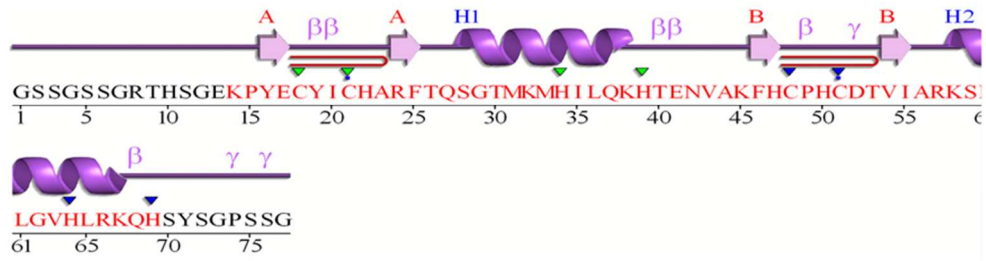

Motifs:  $\beta$  beta turn  $\gamma$  gamma turn  beta hairpin  
 Residue contacts:  to metal  
 PDB SITE records:  AC1  AC2

Secondary structure of CTCF (PDB:2CT1) DNA binding domain.

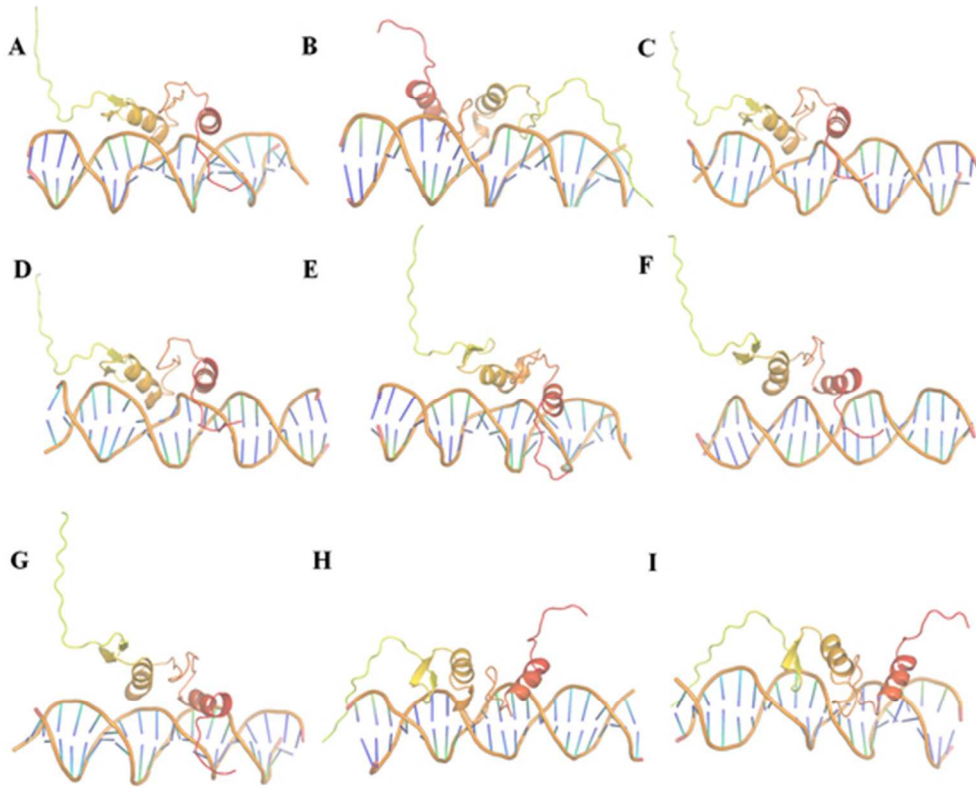

Lowest energy structures of the docked C-allele:CTCF complex.

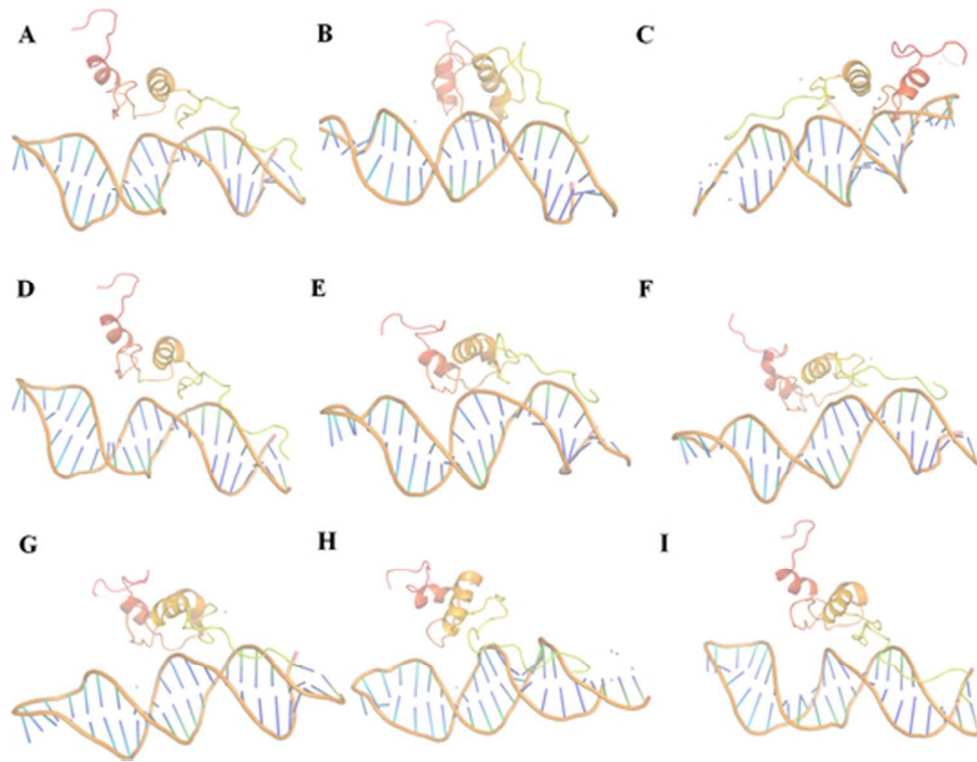

Lowest energy structures of the docked T-allele:CTCF complex.

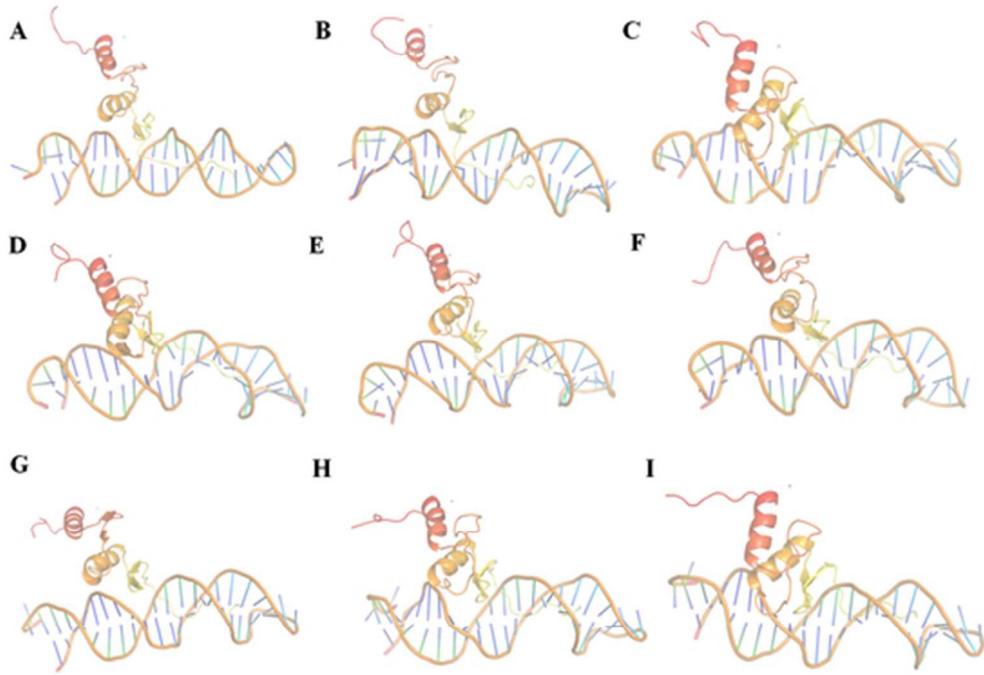

Lowest energy structures of the docked me-C-allele:CTCF complex.

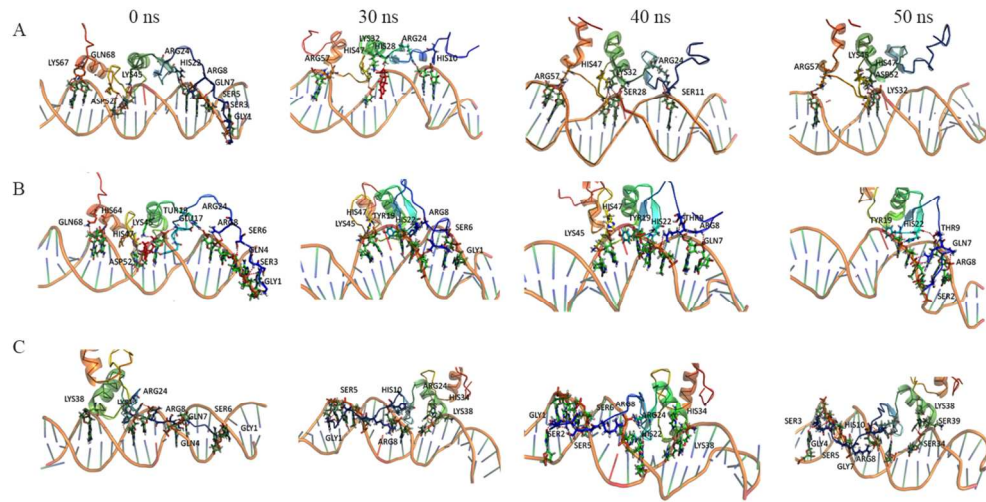

Conformational changes of DNA:Protein complexes over simulation time of 50 ns. Time 0 ns represent the start of reaction and 50 ns represent end of reaction. (A) C-allele:CTCF complex, (B) T-allele:CTCF complex, (C) me-C-allele:CTCF complex.

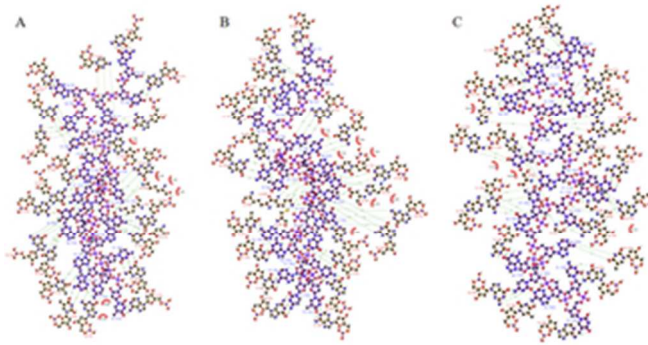

2D graph showing the residue contacts of the docked complexes. (A) C-allele:CTCF complex, (B) T-allele:CTCF complex, (C) me-C-allele:CTCF complex.
